# Supplementary material for: Astragaloside IV promotes the eNOS/NO/cGMP pathway and improves left ventricular diastolic function in rats with metabolic syndrome
Source: PubMed Central journal article supplement — J Int Med Res. 2019 Mar 7;48(1):0300060519826848. doi: 10.1177/0300060519826848 (PMC7140221; doi:10.1177/0300060519826848), 2019-03-07
Supplement: Supplemental_Material.pdf [file Supplemental_Material.pdf]

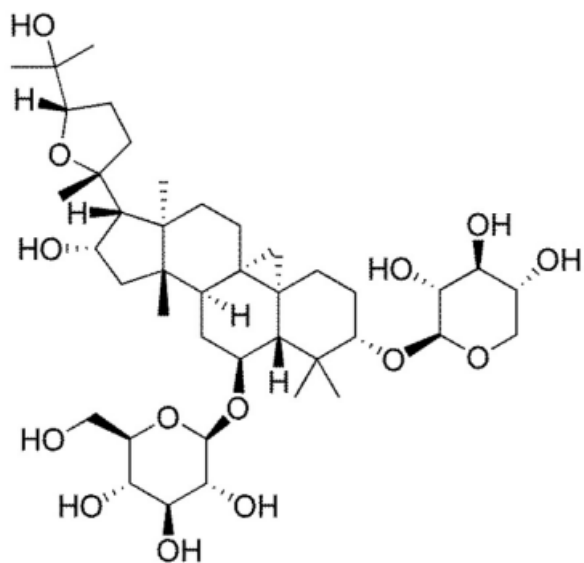

Supplementary Figure 1. The chemical structure of AST <sup>1</sup>

## Reference

1. Li L, Huang W, Wang S, et al. Astragaloside IV Attenuates Acetaminophen-Induced Liver Injuries in Mice by Activating the Nrf2 Signaling Pathway. *Molecules (Basel, Switzerland)*. 2018; 23.
